# Supplementary material for: Cross-sectional imaging: current status and future potential in adult celiac disease
Source: Springer Nature journal article supplement (doi:10.1007/s00330-023-10175-4), 2023-08-30
Supplement: 330_2023_10175_MOESM1_ESM.pdf [file 330_2023_10175_MOESM1_ESM.pdf]

**Supplementary Table 1** Classification of Refractory Celiac Disease [1]

| Type                                                         | I      | II       |
|--------------------------------------------------------------|--------|----------|
| Intraepithelial lymphocyte phenotype                         | Normal | Abnormal |
| Surface marker of intraepithelial lymphocyte for CD3 and CD8 | Yes    | No       |
| T cell receptor clonality rearrangement                      | Yes    | No       |

**Supplementary Table 2** Marsh-Oberhuber Grade for Histopathological Classifications of Celiac Disease [2]

| Type                        | 0 (Normal)          | 1 (Infiltrative type) | 2 (Hyperplastic type) | 3 (Destructive type)    |                          |                       |
|-----------------------------|---------------------|-----------------------|-----------------------|-------------------------|--------------------------|-----------------------|
|                             |                     |                       |                       | 3a                      | 3b                       | 3c                    |
| Intraepithelial lymphocytes | Normal              | Increased             | Increased             | Increased               | Increased                | Increased             |
| Crypt                       | Normal              | Normal                | Enlarged              | Enlarged                | Enlarged                 | Enlarged              |
| Villous architecture        | Normal              | Normal                | Normal                | Partial villous atrophy | Subtotal villous atrophy | Total villous atrophy |
| Villous height/crypt depth  | Normal ( $\geq 3$ ) | Normal ( $\geq 3$ )   | $\geq 2$ to $< 3$     | $\geq 1$ to $< 2$       | $\geq 0.5$ to $< 1$      | $\leq 0.5$            |

**Reference**

- 1 Rubio-Tapia A, Murray JA (2010) Classification and management of refractory coeliac disease. *Gut* 59:547-557
- 2 Oberhuber G (2000) Histopathology of celiac disease. *Biomed Pharmacother* 54:368-372
